# Supplementary material
Source: PubMed Central journal article supplement (PMC2586566)
Supplement: 108.132241_1.pdf [file 108.132241_1.pdf]

# Supplementary Material: $\alpha$ -helical Topology Prediction and Generation of Distance Restraints in Membrane Proteins

Scott R. McAllister and Christodoulos A. Floudas\*  
Department of Chemical Engineering,  
Princeton University,  
Princeton, NJ 08544-5263, U.S.A.

August 18, 2008

## Bilinear Reformulation: Pairwise Model

For clarity, the variables  $Z_{mn}^A$  and  $Z_{mn}^P$  are introduced in Equations 1 and 2. Given these definitions, the objective function can be further simplified by the introduction of  $U_{mn}^A$  and  $U_{mn}^P$  in Equations 3 and 4.

$$Z_{mn}^A = \sum_i \sum_j w_{ij}^{mn} \cdot p_{ij}^A \quad \forall(m, n) \quad (1)$$

$$Z_{mn}^P = \sum_i \sum_j w_{ij}^{mn} \cdot p_{ij}^P \quad \forall(m, n) \quad (2)$$

$$U_{mn}^A = y_{mn}^A \cdot Z_{mn}^A \quad \forall(m, n) \quad (3)$$

$$U_{mn}^P = y_{mn}^P \cdot Z_{mn}^P \quad \forall(m, n) \quad (4)$$

Equations 5 through 8 are equivalent to the definitions of Equations 3 and 4, but are used to linearize the system with an equivalent representation (1).

$$0 \leq U_{mn}^A \leq Z_{mn}^A \quad \forall(m, n) \quad (5)$$

$$Z_{mn}^A - (Z_{mn}^A)^U (1 - y_{mn}^A) \leq U_{mn}^A \leq (Z_{mn}^A)^U \cdot y_{mn}^A \quad \forall(m, n) \quad (6)$$

$$0 \leq U_{mn}^P \leq Z_{mn}^P \quad \forall(m, n) \quad (7)$$

$$Z_{mn}^P - (Z_{mn}^P)^U (1 - y_{mn}^P) \leq U_{mn}^P \leq (Z_{mn}^P)^U \cdot y_{mn}^P \quad \forall(m, n) \quad (8)$$

---

\*Author to whom all correspondence should be addressed; Tel: +1-609-258-4595; Fax: +1-609-258-0211.  
E-mail: floudas@titan.princeton.edu

The addition of the above equations to the model simplifies the objective function to the linear form of Equation 9, allowing the use of mixed-integer linear programming (MILP) solvers.

$$\max \sum_m \sum_{n; m < n} U_{mn}^A + U_{mn}^P \quad (9)$$

## Bilinear Reformulation: Triplet Model

The constraints below must also be included in the triplet model for the given definitions of  $Z_{m,n}^A$  and  $Z_{m,n}^P$ .

$$OBJ = \sum_m \sum_{n; m < n} U_{mn}^A + U_{mn}^P \quad (10)$$

$$Z_{mn}^A = \sum_i \sum_j \sum_t w_{ijt}^{mn} \cdot p_{ijt}^A \quad \forall(m, n) \quad (11)$$

$$Z_{mn}^P = \sum_i \sum_j \sum_t w_{ijt}^{mn} \cdot p_{ijt}^P \quad \forall(m, n) \quad (12)$$

$$U_{mn}^A \leq Z_{mn}^A \quad \forall(m, n) \quad (13)$$

$$U_{mn}^A \leq (Z_{mn}^A)^U \cdot y_{mn}^A \quad \forall(m, n) \quad (14)$$

$$U_{mn}^A \geq Z_{mn}^A - (Z_{mn}^A)^U \cdot (1 - y_{mn}^A) \quad \forall(m, n) \quad (15)$$

$$U_{mn}^P \leq Z_{mn}^P \quad \forall(m, n) \quad (16)$$

$$U_{mn}^P \leq (Z_{mn}^P)^U \cdot y_{mn}^P \quad \forall(m, n) \quad (17)$$

$$U_{mn}^P \geq Z_{mn}^P - (Z_{mn}^P)^U \cdot (1 - y_{mn}^P) \quad \forall(m, n) \quad (18)$$

## 1h2sB: A Bundle of 2 Helices

The first membrane protein selected for evaluation, 1h2sB, is a signal transducer protein that consists of 2 transmembrane helices (4). The two  $\alpha$ -helices exist in an antiparallel orientation and bind tightly to a receptor membrane protein. The entire transducer protein is composed of a 28 residue  $\alpha$ -helix, a 2 residue loop region, and a 30 residue  $\alpha$ -helix. The proposed models for interhelical pair and three-body contact prediction are applied for a subtract parameter value of 0, a max\_contact parameter range of 1-2, and a total of 20 iterations. These runs are performed for both the probability sets derived from the data set in Section 3.2 and the probabilities based on the work of Liang and co-workers (2, 3). It is notable

that for all four probability sets, the best result after 5 iterations remains unchanged after 10 and 20 iterations of the model. The best average contact distances for these runs are displayed in Table 1. One particularly good contact prediction is presented in Table 2 and has an average contact distance value of 8.93 Å over 2 three-body contacts. This contact prediction is illustrated in Figure 1.

Table 1: The best average contact distances of the 1h2sB protein predictions using four probability sets. All distances are in Å.

| PAIR<br>MIN-1 | PAIR<br>AL-P | TRIP<br>MIN-2 | TRIP<br>AL-T |
|---------------|--------------|---------------|--------------|
| 10.45         | 8.75         | 8.80          | 10.50        |

Table 2: A high-scoring set of contact predictions for 1h2sB using the triplet model and the AL-T probability set

| Three-body<br>Contact | Three-body<br>Distances (Å) | Helix<br>Pair |
|-----------------------|-----------------------------|---------------|
| 25V-(77L,78V)         | 10.0,8.1                    | 1-2           |
| 46A-(55A,56V)         | 9.3,8.3                     | 1-2           |

## Model Complexity

Table 3: A comparison of the complexity of both optimization models applied to bovine rhodopsin (1f88A) with a subtract value of 0 and a *max.contact* value of 2

| Model   | Probability set | Binary Variables | Constraints | CPU Time |
|---------|-----------------|------------------|-------------|----------|
| Pair    | AL-P            | 1350             | 80377       | 510s     |
| Pair    | MIN-1           | 3368             | 170934      | 87s      |
| Triplet | AL-T            | 317              | 23706       | <1s      |
| Triplet | MIN-2           | 112              | 7448        | <1s      |

|   | A        | F        | G        | I        | L        | M        | P        | V        | W        |
|---|----------|----------|----------|----------|----------|----------|----------|----------|----------|
| A | 0.009554 | -        | -        | -        | -        | -        | -        | -        | -        |
| F | 0.012739 | 0.000000 | -        | -        | -        | -        | -        | -        | -        |
| G | 0.012739 | 0.009554 | 0.003185 | -        | -        | -        | -        | -        | -        |
| I | 0.012739 | 0.009554 | 0.009554 | 0.003185 | -        | -        | -        | -        | -        |
| L | 0.022293 | 0.003185 | 0.009554 | 0.009554 | 0.012739 | -        | -        | -        | -        |
| M | 0.009554 | 0.006369 | 0.000000 | 0.000000 | 0.006369 | 0.000000 | -        | -        | -        |
| P | 0.012739 | 0.000000 | 0.012739 | 0.000000 | 0.003185 | 0.000000 | 0.000000 | -        | -        |
| V | 0.009554 | 0.003185 | 0.022293 | 0.003185 | 0.009554 | 0.009554 | 0.006369 | 0.006369 | -        |
| W | 0.006369 | 0.003185 | 0.003185 | 0.003185 | 0.000000 | 0.000000 | 0.000000 | 0.000000 | 0.003185 |
| C | 0.003185 | 0.000000 | 0.003185 | 0.003185 | 0.000000 | 0.000000 | 0.000000 | 0.000000 | 0.000000 |
| N | 0.006369 | 0.003185 | 0.003185 | 0.003185 | 0.003185 | 0.000000 | 0.000000 | 0.000000 | 0.000000 |
| Q | 0.000000 | 0.003185 | 0.003185 | 0.000000 | 0.003185 | 0.000000 | 0.000000 | 0.000000 | 0.000000 |
| S | 0.003185 | 0.006369 | 0.006369 | 0.006369 | 0.003185 | 0.000000 | 0.006369 | 0.003185 | 0.003185 |
| T | 0.000000 | 0.003185 | 0.009554 | 0.003185 | 0.003185 | 0.000000 | 0.003185 | 0.000000 | 0.000000 |
| Y | 0.000000 | 0.003185 | 0.000000 | 0.000000 | 0.000000 | 0.000000 | 0.000000 | 0.006369 | 0.000000 |

Table 4: Parallel PRIMARY MIN-1 pairwise probabilities

|   | A        | F        | G        | I        | L        | M        | P        | V        | W        |
|---|----------|----------|----------|----------|----------|----------|----------|----------|----------|
| A | 0.012739 | -        | -        | -        | -        | -        | -        | -        | -        |
| F | 0.012739 | 0.009554 | -        | -        | -        | -        | -        | -        | -        |
| G | 0.022293 | 0.019108 | 0.022293 | -        | -        | -        | -        | -        | -        |
| I | 0.012739 | 0.006369 | 0.012739 | 0.000000 | -        | -        | -        | -        | -        |
| L | 0.022293 | 0.009554 | 0.015924 | 0.003185 | 0.012739 | -        | -        | -        | -        |
| M | 0.006369 | 0.000000 | 0.000000 | 0.003185 | 0.000000 | 0.003185 | -        | -        | -        |
| P | 0.012739 | 0.003185 | 0.012739 | 0.009554 | 0.000000 | 0.003185 | 0.000000 | -        | -        |
| V | 0.025478 | 0.009554 | 0.009554 | 0.003185 | 0.009554 | 0.009554 | 0.003185 | 0.009554 | -        |
| W | 0.000000 | 0.006369 | 0.006369 | 0.000000 | 0.000000 | 0.000000 | 0.003185 | 0.000000 | 0.000000 |
| C | 0.006369 | 0.003185 | 0.000000 | 0.003185 | 0.006369 | 0.003185 | 0.000000 | 0.003185 | 0.000000 |
| N | 0.012739 | 0.000000 | 0.003185 | 0.000000 | 0.000000 | 0.006369 | 0.003185 | 0.003185 | 0.006369 |
| Q | 0.000000 | 0.003185 | 0.000000 | 0.000000 | 0.000000 | 0.000000 | 0.000000 | 0.003185 | 0.000000 |
| S | 0.025478 | 0.009554 | 0.012739 | 0.006369 | 0.003185 | 0.000000 | 0.003185 | 0.009554 | 0.006369 |
| T | 0.019108 | 0.012739 | 0.009554 | 0.012739 | 0.015924 | 0.000000 | 0.006369 | 0.003185 | 0.000000 |
| Y | 0.006369 | 0.006369 | 0.006369 | 0.006369 | 0.009554 | 0.000000 | 0.006369 | 0.000000 | 0.003185 |

Table 5: Antiparallel PRIMARY MIN-1 pairwise probabilities

|   | A        | F        | G        | I        | L        | M        | P        | V        | W        |
|---|----------|----------|----------|----------|----------|----------|----------|----------|----------|
| A | 0.708333 | -        | -        | -        | -        | -        | -        | -        | -        |
| F | 0.472222 | 0.000000 | -        | -        | -        | -        | -        | -        | -        |
| G | 0.750000 | 0.625000 | 0.500000 | -        | -        | -        | -        | -        | -        |
| I | 0.687500 | 1.000000 | 0.562500 | 1.000000 | -        | -        | -        | -        | -        |
| L | 0.583333 | 0.750000 | 0.583333 | 0.416667 | 1.000000 | -        | -        | -        | -        |
| M | 0.583333 | 0.500000 | 0.000000 | 0.000000 | 0.416667 | 0.000000 | -        | -        | -        |
| P | 0.466667 | 0.000000 | 0.900000 | 0.000000 | 1.000000 | 0.000000 | 0.000000 | -        | -        |
| V | 0.666667 | 0.375000 | 0.589286 | 0.500000 | 0.555556 | 0.314286 | 0.250000 | 0.685714 | -        |
| W | 0.500000 | 1.000000 | 0.500000 | 0.000000 | 0.000000 | 0.000000 | 0.000000 | 0.000000 | 1.000000 |
| C | 0.000000 | 0.000000 | 0.625000 | 0.800000 | 0.000000 | 0.000000 | 0.000000 | 0.000000 | 0.000000 |
| N | 0.125000 | 0.000000 | 0.000000 | 0.333333 | 1.000000 | 0.000000 | 0.000000 | 0.000000 | 0.000000 |
| Q | 0.000000 | 0.750000 | 0.250000 | 0.000000 | 0.250000 | 0.000000 | 0.000000 | 0.000000 | 0.000000 |
| S | 1.000000 | 0.625000 | 0.000000 | 1.000000 | 0.500000 | 0.000000 | 0.000000 | 1.000000 | 1.000000 |
| T | 0.000000 | 0.250000 | 0.500000 | 0.000000 | 0.714286 | 0.000000 | 0.000000 | 0.000000 | 0.000000 |
| Y | 0.000000 | 0.800000 | 0.000000 | 0.000000 | 0.000000 | 0.000000 | 0.000000 | 0.250000 | 0.000000 |

Table 6: Parallel WHEEL MIN-1 pairwise probabilities

|   | A        | F        | G        | I        | L        | M        | P        | V        | W        |
|---|----------|----------|----------|----------|----------|----------|----------|----------|----------|
| A | 0.843750 | -        | -        | -        | -        | -        | -        | -        | -        |
| F | 0.250000 | 0.437500 | -        | -        | -        | -        | -        | -        | -        |
| G | 0.475000 | 0.416667 | 0.500000 | -        | -        | -        | -        | -        | -        |
| I | 0.791667 | 0.625000 | 0.486111 | 0.000000 | -        | -        | -        | -        | -        |
| L | 0.472619 | 0.674603 | 0.475000 | 0.666667 | 0.666667 | -        | -        | -        | -        |
| M | 0.541667 | 0.000000 | 0.000000 | 0.250000 | 0.000000 | 0.000000 | -        | -        | -        |
| P | 0.531250 | 0.000000 | 0.580357 | 0.583333 | 0.000000 | 0.750000 | 0.000000 | -        | -        |
| V | 0.520833 | 0.750000 | 0.500000 | 0.500000 | 0.583333 | 0.575000 | 1.000000 | 0.619048 | -        |
| W | 0.000000 | 0.589286 | 0.666667 | 0.000000 | 0.000000 | 0.000000 | 0.500000 | 0.000000 | 0.000000 |
| C | 0.425000 | 0.500000 | 0.000000 | 0.000000 | 0.875000 | 0.500000 | 0.000000 | 0.500000 | 0.000000 |
| N | 0.250000 | 0.000000 | 0.000000 | 0.000000 | 0.000000 | 0.000000 | 0.000000 | 0.000000 | 0.416667 |
| Q | 0.000000 | 1.000000 | 0.000000 | 0.000000 | 0.000000 | 0.000000 | 0.000000 | 0.250000 | 0.000000 |
| S | 0.468750 | 0.500000 | 0.687500 | 0.875000 | 0.250000 | 0.000000 | 0.500000 | 0.327778 | 0.500000 |
| T | 0.513889 | 0.666667 | 0.700000 | 0.625000 | 0.708333 | 0.000000 | 0.687500 | 0.000000 | 0.000000 |
| Y | 0.500000 | 0.500000 | 0.083333 | 0.500000 | 0.555556 | 0.000000 | 0.625000 | 0.000000 | 0.000000 |

Table 7: Antiparallel WHEEL MIN-1 pairwise probabilities

|   | A        | F        | G        | I        | L        | M        | P        | V        | W        |
|---|----------|----------|----------|----------|----------|----------|----------|----------|----------|
| A | 0.000000 | -        | -        | -        | -        | -        | -        | -        | -        |
| F | 0.008398 | 0.012146 | -        | -        | -        | -        | -        | -        | -        |
| G | 0.000000 | 0.005580 | 0.000000 | -        | -        | -        | -        | -        | -        |
| I | 0.000000 | 0.008495 | 0.000000 | 0.000000 | -        | -        | -        | -        | -        |
| L | 0.009855 | 0.021224 | 0.005830 | 0.013215 | 0.014242 | -        | -        | -        | -        |
| M | 0.000000 | 0.007829 | 0.000000 | 0.000000 | 0.007621 | 0.000000 | -        | -        | -        |
| P | 0.000000 | 0.000000 | 0.000000 | 0.000000 | 0.000000 | 0.000000 | 0.000000 | -        | -        |
| V | 0.000000 | 0.009134 | 0.000000 | 0.005872 | 0.013506 | 0.000000 | 0.000000 | 0.000000 | -        |
| W | 0.000000 | 0.012673 | 0.000000 | 0.006455 | 0.012243 | 0.000000 | 0.000000 | 0.005677 | 0.000000 |
| C | 0.000000 | 0.000000 | 0.000000 | 0.000000 | 0.000000 | 0.000000 | 0.000000 | 0.000000 | 0.000000 |
| N | 0.000000 | 0.000000 | 0.000000 | 0.000000 | 0.000000 | 0.000000 | 0.000000 | 0.000000 | 0.000000 |
| Q | 0.000000 | 0.000000 | 0.000000 | 0.000000 | 0.000000 | 0.000000 | 0.000000 | 0.000000 | 0.000000 |
| S | 0.000000 | 0.000000 | 0.000000 | 0.000000 | 0.006705 | 0.000000 | 0.000000 | 0.000000 | 0.000000 |
| T | 0.000000 | 0.000000 | 0.000000 | 0.000000 | 0.000000 | 0.000000 | 0.000000 | 0.000000 | 0.000000 |
| Y | 0.000000 | 0.000000 | 0.000000 | 0.000000 | 0.009620 | 0.000000 | 0.000000 | 0.000000 | 0.000000 |

Table 8: Parallel PRIMARY AL pairwise probabilities



|   | A        | F        | G        | I        | L        | M        | P        | V        | W        |
|---|----------|----------|----------|----------|----------|----------|----------|----------|----------|
| A | 0.000000 | -        | -        | -        | -        | -        | -        | -        | -        |
| F | 0.015616 | 0.022557 | -        | -        | -        | -        | -        | -        | -        |
| G | 0.000000 | 0.010369 | 0.000000 | -        | -        | -        | -        | -        | -        |
| I | 0.000000 | 0.015783 | 0.000000 | 0.000000 | -        | -        | -        | -        | -        |
| L | 0.018309 | 0.039436 | 0.010827 | 0.024542 | 0.026443 | -        | -        | -        | -        |
| M | 0.000000 | 0.014533 | 0.000000 | 0.000000 | 0.014172 | 0.000000 | -        | -        | -        |
| P | 0.000000 | 0.000000 | 0.000000 | 0.000000 | 0.000000 | 0.000000 | 0.000000 | -        | -        |
| V | 0.000000 | 0.016963 | 0.000000 | 0.010910 | 0.025083 | 0.000000 | 0.000000 | 0.000000 | -        |
| W | 0.000000 | 0.023542 | 0.000000 | 0.012007 | 0.022737 | 0.000000 | 0.000000 | 0.010550 | 0.000000 |
| C | 0.000000 | 0.000000 | 0.000000 | 0.000000 | 0.000000 | 0.000000 | 0.000000 | 0.000000 | 0.000000 |
| N | 0.000000 | 0.000000 | 0.000000 | 0.000000 | 0.000000 | 0.000000 | 0.000000 | 0.000000 | 0.000000 |
| Q | 0.000000 | 0.000000 | 0.000000 | 0.000000 | 0.000000 | 0.000000 | 0.000000 | 0.000000 | 0.000000 |
| S | 0.000000 | 0.000000 | 0.000000 | 0.000000 | 0.012451 | 0.000000 | 0.000000 | 0.000000 | 0.000000 |
| T | 0.000000 | 0.000000 | 0.000000 | 0.000000 | 0.000000 | 0.000000 | 0.000000 | 0.000000 | 0.000000 |
| Y | 0.000000 | 0.000000 | 0.000000 | 0.000000 | 0.017865 | 0.000000 | 0.000000 | 0.000000 | 0.000000 |

Table 9: Antiparallel PRIMARY AL pairwise probabilities

| Triplet | Prob     | Triplet | Prob     | Triplet | Prob     | Triplet | Prob     |
|---------|----------|---------|----------|---------|----------|---------|----------|
| AAF     | 0.011450 | AVG     | 0.007634 | GGV     | 0.011450 | LLL     | 0.007634 |
| AAL     | 0.015267 | AVV     | 0.007634 | GGY     | 0.007634 | LSV     | 0.007634 |
| AAV     | 0.007634 | FAI     | 0.007634 | GLL     | 0.011450 | LVP     | 0.007634 |
| AGI     | 0.007634 | FLV     | 0.007634 | IAL     | 0.007634 | LVW     | 0.007634 |
| AGT     | 0.007634 | FRI     | 0.007634 | IAM     | 0.007634 | LVY     | 0.007634 |
| ALG     | 0.007634 | FVL     | 0.011450 | IGV     | 0.007634 | MGR     | 0.007634 |
| ALL     | 0.007634 | GAL     | 0.007634 | LAL     | 0.007634 | PVY     | 0.007634 |
| ALP     | 0.007634 | GGI     | 0.011450 | LAV     | 0.011450 | RMT     | 0.007634 |
| ALY     | 0.007634 | GGL     | 0.007634 | LFY     | 0.007634 | TLV     | 0.007634 |
| AMI     | 0.007634 | GGT     | 0.007634 | LIV     | 0.007634 | TMV     | 0.007634 |
| AVA     | 0.007634 |         |          |         |          |         |          |

Table 10: Parallel MIN-2 three-body probabilities

| Triplet | Prob     | Triplet | Prob     | Triplet | Prob     | Triplet | Prob     |
|---------|----------|---------|----------|---------|----------|---------|----------|
| AAI     | 0.007634 | FAF     | 0.007634 | GHS     | 0.007634 | LGV     | 0.011450 |
| AAL     | 0.007634 | FAN     | 0.011450 | GLL     | 0.007634 | LHV     | 0.007634 |
| AAV     | 0.007634 | FGH     | 0.007634 | GNT     | 0.011450 | LLT     | 0.015267 |
| AAY     | 0.007634 | FGL     | 0.022901 | GPT     | 0.007634 | LLV     | 0.011450 |
| AFL     | 0.007634 | FGY     | 0.007634 | GVM     | 0.007634 | LLY     | 0.007634 |
| AGG     | 0.019084 | FII     | 0.007634 | GYS     | 0.007634 | LRV     | 0.007634 |
| AGI     | 0.011450 | FSS     | 0.007634 | HVV     | 0.007634 | LVP     | 0.007634 |
| AGL     | 0.015267 | FTL     | 0.007634 | IFL     | 0.007634 | LVV     | 0.022901 |
| AIL     | 0.011450 | GAM     | 0.007634 | IFV     | 0.007634 | NNP     | 0.007634 |
| ALA     | 0.007634 | GAS     | 0.011450 | IIM     | 0.007634 | NYY     | 0.007634 |
| ALL     | 0.007634 | GAT     | 0.007634 | IVL     | 0.007634 | QAV     | 0.007634 |
| ANP     | 0.007634 | GCI     | 0.007634 | LAL     | 0.007634 | SFY     | 0.007634 |
| ASE     | 0.007634 | GFT     | 0.007634 | LAS     | 0.007634 | TGV     | 0.007634 |
| ATP     | 0.007634 | GGI     | 0.007634 | LAT     | 0.015267 | TLV     | 0.007634 |
| AVA     | 0.015267 | GGL     | 0.011450 | LAV     | 0.011450 | TNV     | 0.007634 |
| AVI     | 0.007634 | GGT     | 0.007634 | LAW     | 0.015267 | VGY     | 0.007634 |
| AYF     | 0.007634 | GGV     | 0.011450 | LGQ     | 0.007634 | VSV     | 0.011450 |
| ENV     | 0.007634 |         |          |         |          |         |          |

Table 11: Antiarallel MIN-2 three-body probabilities

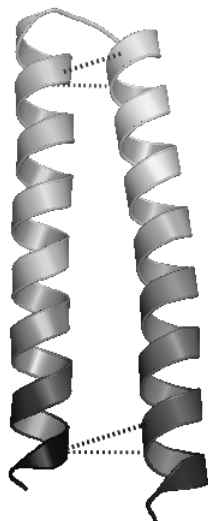

Figure 1: A high-scoring set of contact predictions (blue dashes) for 1h2sB using the triplet model and the AL-T probability set. This figure has been created using PyMol (5).

| Triplet | Prob     | Triplet | Prob     | Triplet | Prob     | Triplet | Prob     |
|---------|----------|---------|----------|---------|----------|---------|----------|
| AAA     | 0.006857 | AGS     | 0.017143 | APY     | 0.006286 | GHT     | 0.009143 |
| AAF     | 0.021143 | AGT     | 0.015429 | ARG     | 0.010286 | GIL     | 0.022857 |
| AAG     | 0.028571 | AGV     | 0.025143 | ASS     | 0.010286 | GLL     | 0.030857 |
| AAI     | 0.021714 | AGY     | 0.012571 | ASV     | 0.010857 | GLM     | 0.018857 |
| AAL     | 0.025714 | AHS     | 0.012000 | ATV     | 0.014857 | GLV     | 0.030286 |
| AAM     | 0.014857 | AHT     | 0.009143 | CGF     | 0.007429 | GMF     | 0.016000 |
| AAP     | 0.005714 | AIM     | 0.014286 | GFF     | 0.021143 | GMS     | 0.011429 |
| AAS     | 0.007429 | AIP     | 0.008571 | GFS     | 0.008571 | GMV     | 0.016000 |
| AAV     | 0.010857 | AIT     | 0.013143 | GGF     | 0.017143 | GMW     | 0.009143 |
| AAW     | 0.010857 | ALL     | 0.036000 | GGG     | 0.005714 | GST     | 0.011429 |
| ACI     | 0.008571 | ALM     | 0.021143 | GGI     | 0.009714 | GSV     | 0.005714 |
| AFP     | 0.010286 | ALS     | 0.026857 | GGL     | 0.013143 | GTV     | 0.008571 |
| AGF     | 0.042857 | AMF     | 0.019429 | GGM     | 0.009714 | GVV     | 0.006286 |
| AGG     | 0.037143 | AMV     | 0.013714 | GS      | 0.009143 | IIM     | 0.010286 |
| AGI     | 0.025143 | ANG     | 0.006857 | GGV     | 0.009714 | NGS     | 0.006286 |
| AGL     | 0.050857 | ANY     | 0.006857 | GHS     | 0.006286 | STV     | 0.008571 |
| AGM     | 0.013143 | APT     | 0.008000 |         |          |         |          |

Table 12: AL-T three-body probabilities

## References

1. Floudas, C. A., 1995. *Nonlinear and Mixed-integer Optimization: Fundamentals and Applications*. Oxford University Press.
2. Adamian, L., and J. Liang, 2001. Helix-Helix Packing and Interfacial Pairwise Interactions of Residues in Membrane Proteins. *J. Mol. Biol.* 311:891–907.
3. Adamian, L., R. Jackups Jr., T. A. Binkowski, and J. Liang, 2003. Higher-order Interhelical Spatial Interactions in Membrane Proteins. *J. Mol. Biol.* 327:251–272.
4. Gordeliy, V. I., J. Labahn, R. Moukhametzianov, R. Efremov, J. Granzin, R. Schlesinger, G. Büldt, T. Savopol, A. J. Scheidig, J. P. Klare, and M. Engelhard, 2002. Molecular basis of transmembrane signalling by sensory rhodopsin II-transducer complex. *Nature* 419:484–487.
5. DeLano, W. L., 2002. *The PyMol Molecular Graphics System*. DeLano Scientific, Palo Alto, CA USA. <http://www.pymol.org>.
